# Supplementary material for: Accelerating glucose electrolysis on Cu-doped MIL-88B for an energy efficient anodic reaction in water splitting
Source: Royal Society of Chemistry journal article supplement (doi:10.1039/d3dt01773g), 2023-01-01
Supplement: d3dt01773g1.pdf [file d3dt01773g1.pdf]

## Supplementary Materials

### **Accelerating glucose electrolysis on Cu-doped MIL-88B for an energy efficient anodic reaction in water-splitting**

Nabeen K. Shrestha<sup>\*,a</sup>, Supriya A. Patil<sup>b</sup>, Amol S. Salunke<sup>a</sup>, Akbar I. Inamdar<sup>a</sup>, Hyunsik Im<sup>\*,a</sup>

<sup>a</sup>Division of Physics and Semiconductor Science, Dongguk University, Seoul 04620, Republic of Korea.

<sup>b</sup>Department Nanotechnology & Advanced Materials Engineering, Sejong University, Seoul-05006, Republic of Korea.

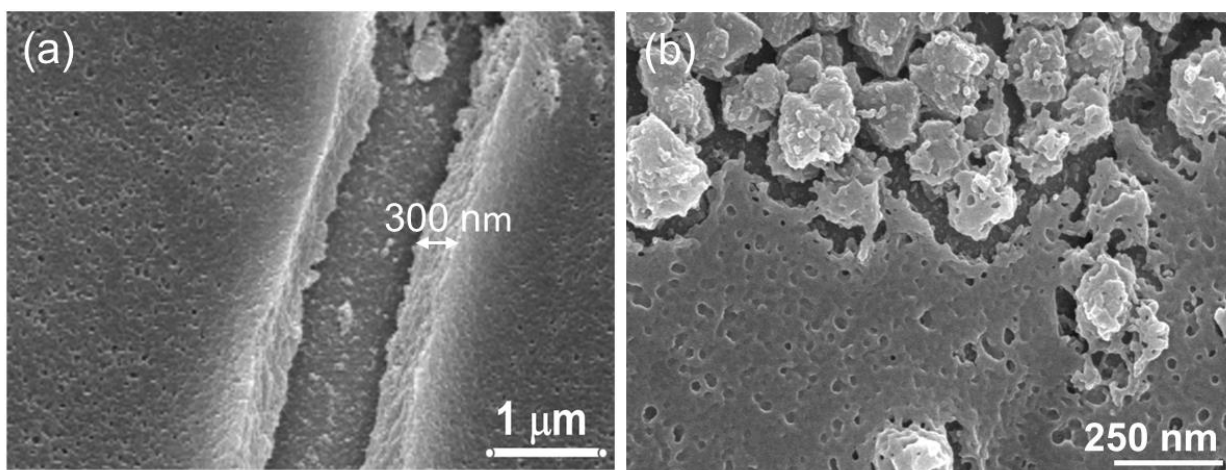

**Figure S1.** SEM image of the cracked surface view of the Cu-doped@MIL-88B film on a nickel foam (a) showing film thickness of ca. 300 nm, and (b) the MOF particles are deposited just underneath the thin nano-porous top layer.

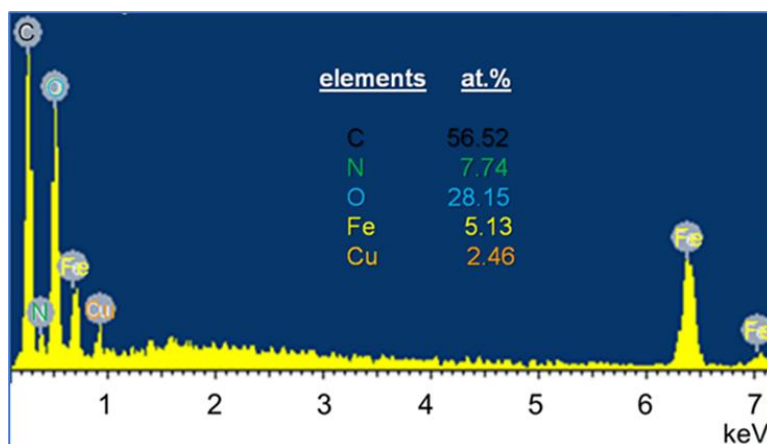

**Figure S2.** X-ray energy dispersive spectroscopy (EDS) spectrum and the atomic % of constitutional element of powder Cu-doped@MIL-88B.

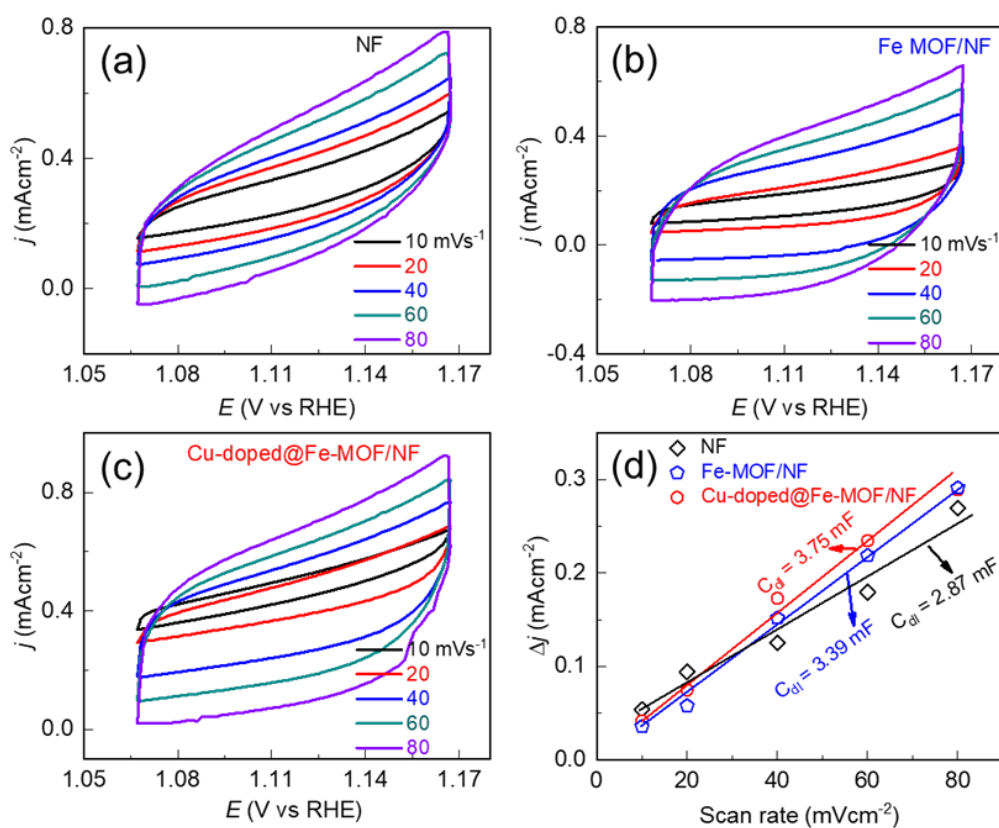

**Figure S3.** cyclic voltammograms of the (a) NF, (b) MIL-88B/NF and (c) Cu-doped@MIL-88B/NF, electrodes measured at various scan speeds in 0.1 M glucose + 1.0 M KOH solution in a non-Faradic region. (d) Linear plots of average current density ( $\Delta j$ ) as a function of scan speeds. The slopes of curves provide the double layer capacitance ( $C_{dl}$ ).

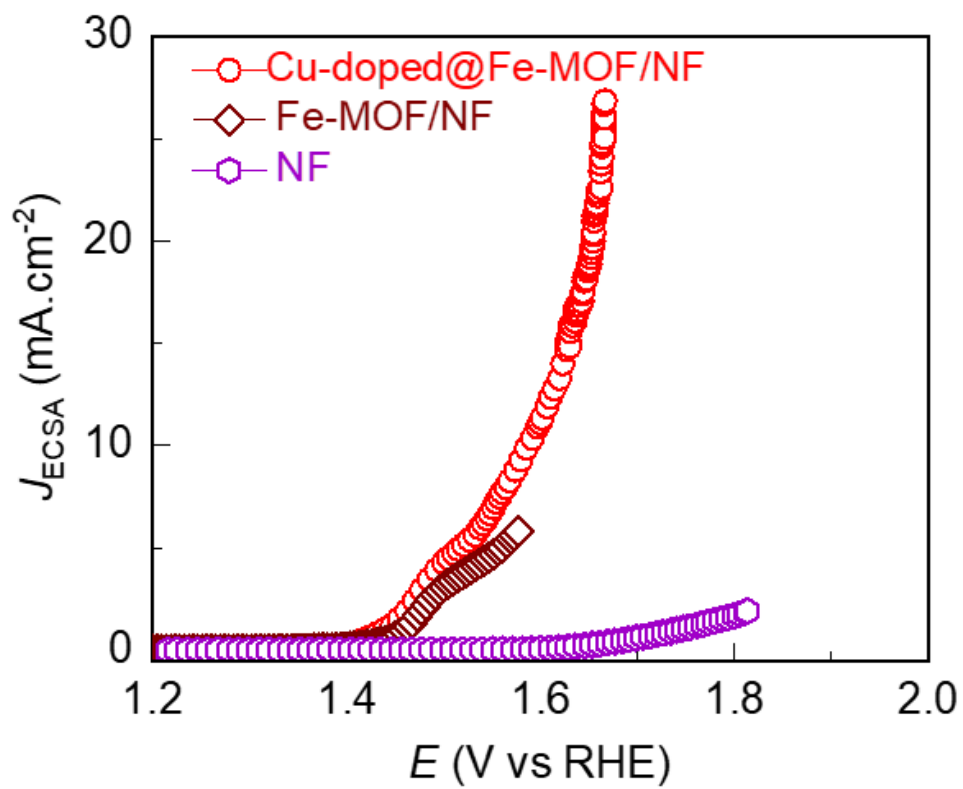

**Figure S4.** ECSA normalized LSV polarization curves for GOR in 0.1 M glucose + 1.0 M KOH aqueous electrolyte solution.

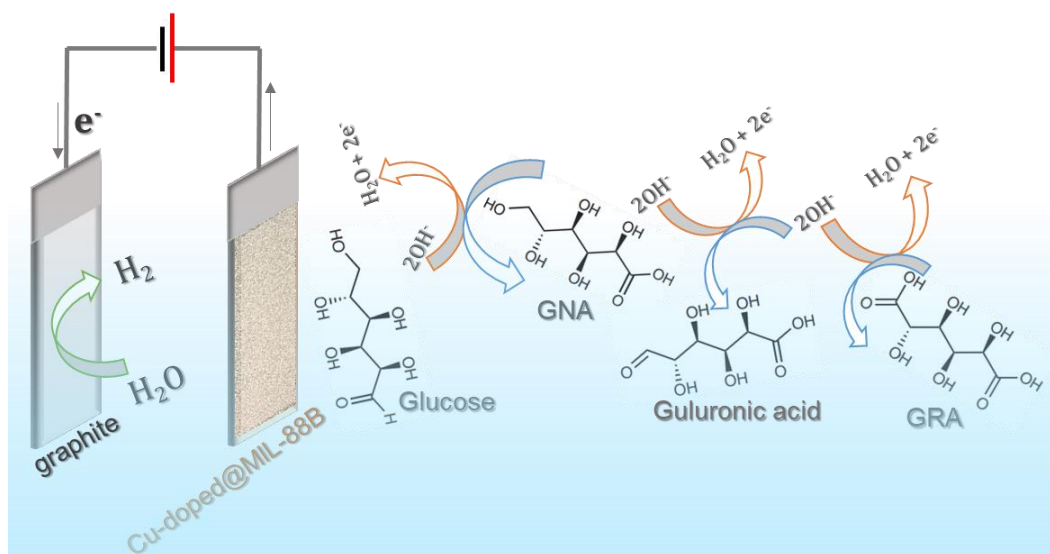

**Figure S5.** Schematic diagram showing the electrolysis of glucose. At the Cu-doped@MIL-88B based anode, glucose oxidation involves the 2-electron transfer in the oxidation of  $-CHO$  to  $-COOH$  (C1-position) followed by 4-electron transfer in the oxidation of  $-CH_2OH$  to  $-COOH$  (C6- position).<sup>[\*]</sup> At the cathode, reduction of water leads to the hydrogen evolution reaction.

<sup>[\*]</sup>W. J. Liu, Z. Xu, D. Zhao, X.-Qi. Pan, H.-C. Li, X. Hu, Z.-Y. Fan, W.-K. Wang, G.-H. Zhao, S. Jin, G. W. Huber, H.-Q. Yu, Nat Commun. 2020, 11, 265.

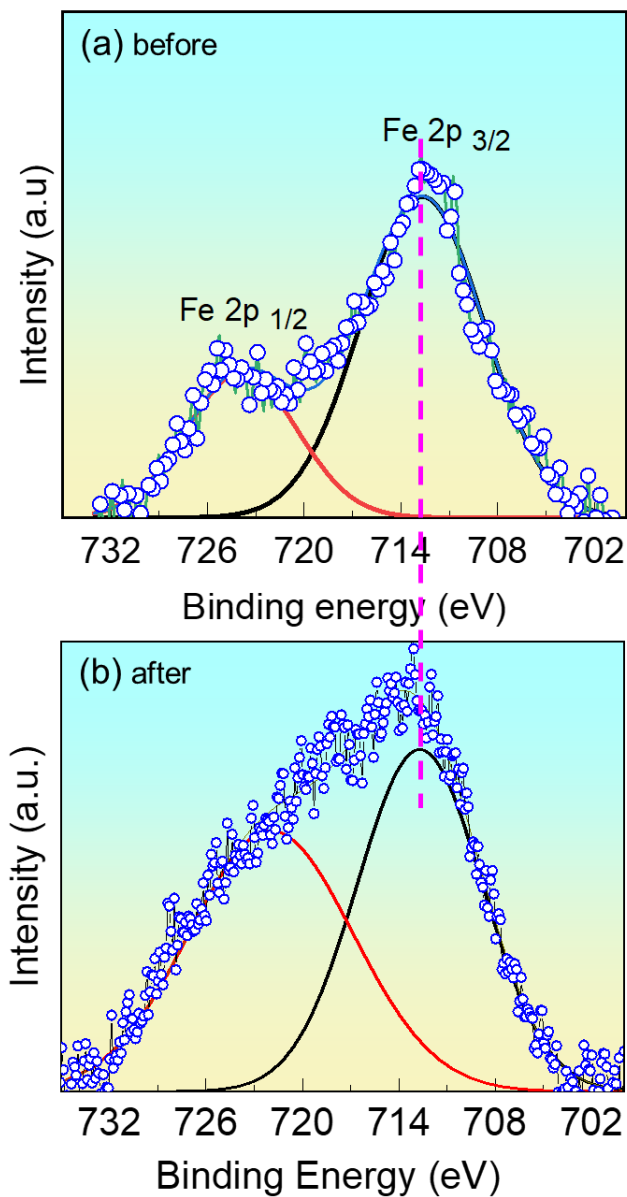

**Figure S6.** Fe 2p XPS spectra of the Cu-doped@MIL-88B/NF electrode (a) before and (b) after, the long-term electrochemical durability test for 50 h at  $10 \text{ mAcm}^{-2}$  in 1.0 M KOH +0.1 M glucose solution.

**Table S1.** Comparison on glucose oxidation activity of various electrocatalysts.

| <i>Catalysts</i>                                 | <i>Electrolyte</i>           | <i>Current density<br/>(mA.cm<sup>-2</sup>)</i> | <i>GOR potential<br/>V vs RHE</i> | <i>Ref.</i>      |
|--------------------------------------------------|------------------------------|-------------------------------------------------|-----------------------------------|------------------|
| Cu-doped@MIL-88B/NF                              | 0.1 M glucose +<br>1.0 M KOH | 10                                              | 1.35                              | <b>This work</b> |
|                                                  |                              | 100                                             | 1.42                              |                  |
|                                                  |                              | 200                                             | 1.46                              |                  |
|                                                  |                              | 350                                             | 1.48                              |                  |
| MIL-88B/NF                                       | 0.1 M glucose +<br>1.0 M KOH | 10                                              | 1.39                              | <b>This work</b> |
|                                                  |                              | 100                                             | 1.46                              |                  |
|                                                  |                              | 200                                             | 1.48                              |                  |
| Cu(OH) <sub>2</sub>                              | 0.1 M glucose +<br>1.0 M KOH | 100                                             | ~ 1.49*                           | [1]              |
| Fe <sub>2</sub> P films                          | 0.5 M glucose +<br>1.0 M KOH | 100                                             | 1.58                              | [2]              |
| NiFeO <sub>x</sub> -NF<br>NiFeN <sub>x</sub> -NF | 0.1 M glucose +<br>1.0 M KOH | 100                                             | ~1.31*                            | [3]              |
|                                                  |                              | 100                                             | ~1.36*                            |                  |
| Cu/CoNC                                          | 0.1 M glucose +<br>1.0 M KOH | 100                                             | ~1.42*                            | [4]              |

\*GOR potentials are estimated from the LSV polarization curves given in the corresponding works.

## SI-References

- [1] Y. Zhang, B. Zhou, Z. Wei, W. Zhou, D. Wang, J. Tian, T. Wang, S. Zhao, J. Liu, L. Tao, S. Wang, *Adv. Mater.* 2021, **33**, 2104791.
- [2] P. Du, J. Zhang, Y. Liu, M. Huang, *Electrochem. Commun.* 2017, **83**, 11.
- [3] W. J. Liu, Z. Xu, D. Zhao, X.-Qi. Pan, H.-C. Li, X. Hu, Z.-Y. Fan, W.-K. Wang, G.-H. Zhao, S. Jin, G. W. Huber, H.-Q. Yu, *Nat Commun.* 2020, **11**, 265.
- [4] Y. Xin, F. Wang, L. Chen, Y. Li, K. Shen, *Green Chem.* 2022, **24**, 6544.
